# Supplementary material for: An O-Demethylation Metabolite of Rabeprazole Sulfide by Cunninghamella blakesleeana 3.970 Biotransformation
Source: MDPI journal article supplement (doi:10.3390/catal13010015), 2022-12-22
Supplement: s1 [file s1]

## Supplementary Material

### An O-Demethylation Metabolite of Rabeprazole Sulfide by *Cunninghamella blakesleeana* 3.970 Biotransformation

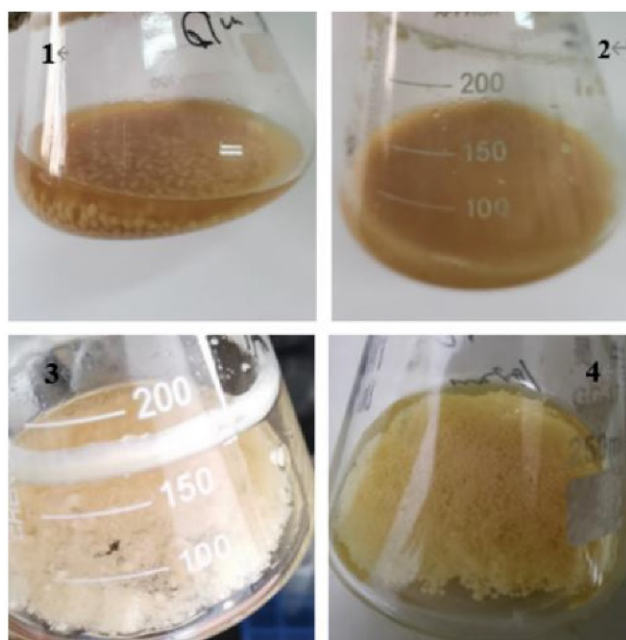

**Figure S1.** Growth of *Cunninghamella blakesleeana* 3.970 in 4 different transformation media formula

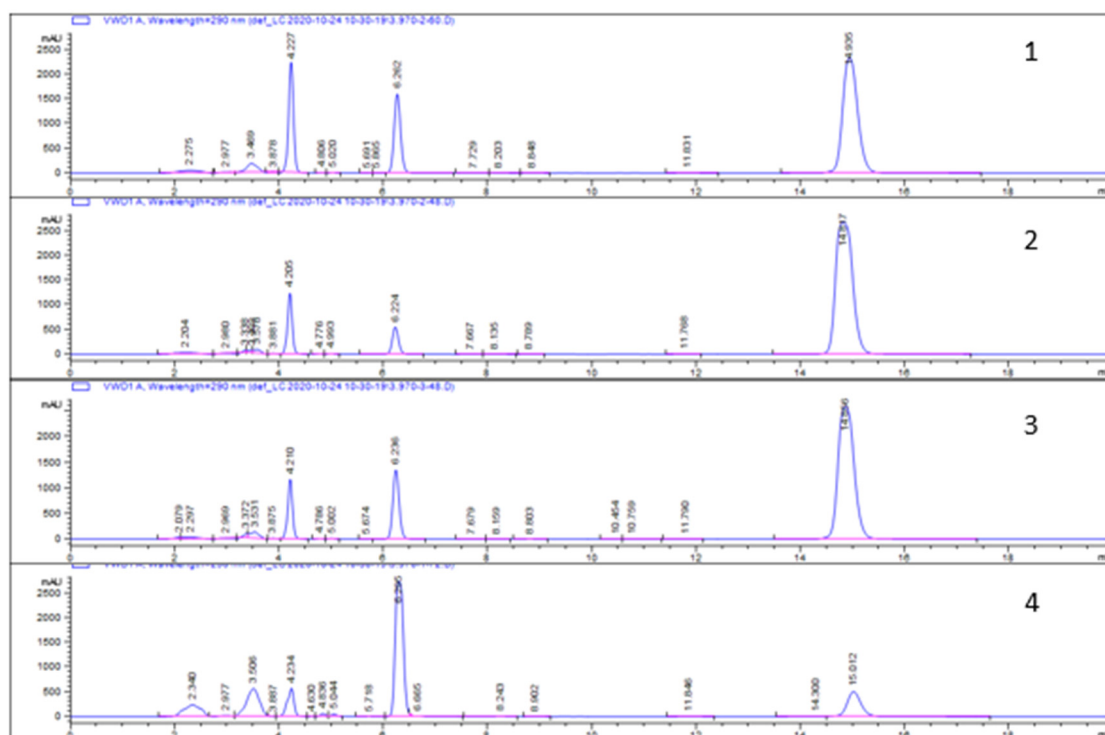

**Figure S2.** HPLC detection results of *Cunninghamella blakesleeana* 3.970 in 4 different transformation media formula

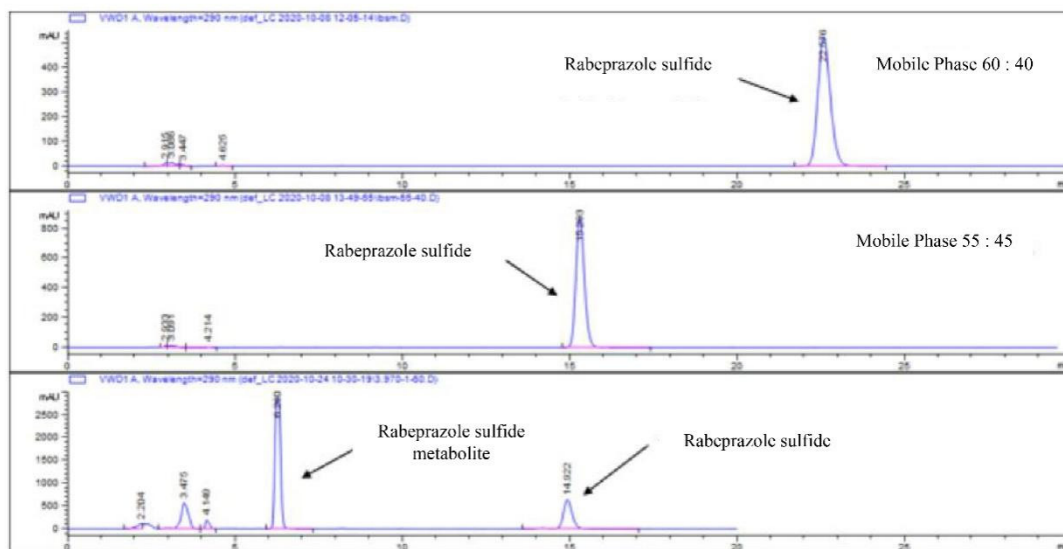

**Figure S3.** HPLC detection results of rabeprazole sulfide and its metabolites.

#### HPLC detection for the rabeprazole sulfide biotransformation

When the mobile phase ingredients change from (0.015mol/L NaHPO<sub>4</sub>: Acetonitrile = 60:40, v/v) to (0.015 mol/L NaHPO<sub>4</sub>: Acetonitrile = 55:45, v/v), the retention time of substrate rabeprazole decreased from 22.4 min to 15.08 min, and the retention time of targeted metabolite is 6.26 min, as Figure S3 indicated.

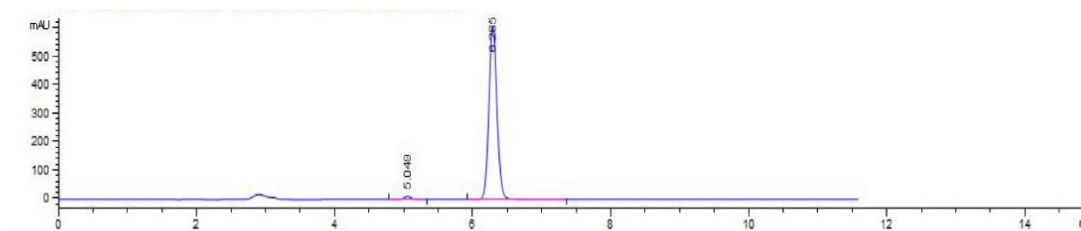

**Figure S4.** HPLC detection results of rabeprazole sulfide metabolites for MS and NMR analysis.

*Semi-preparative HPLC isolation for the rabeprazole sulfide biotransformation*

After optimization, the mobile phase ingredients is consisted of Acetonitrile:H<sub>2</sub>O = 30:70, v/v, loading volume is 100  $\mu$ L, elution speed is 4ml/min, detection wave length is 290 nm, and the column temperature is 30  $^{\circ}$ C. The retention time for the target metabolite is 21.5 min. All the proper eluant were collected and the purity detected by HPLC is 99.2%, Figure 10.

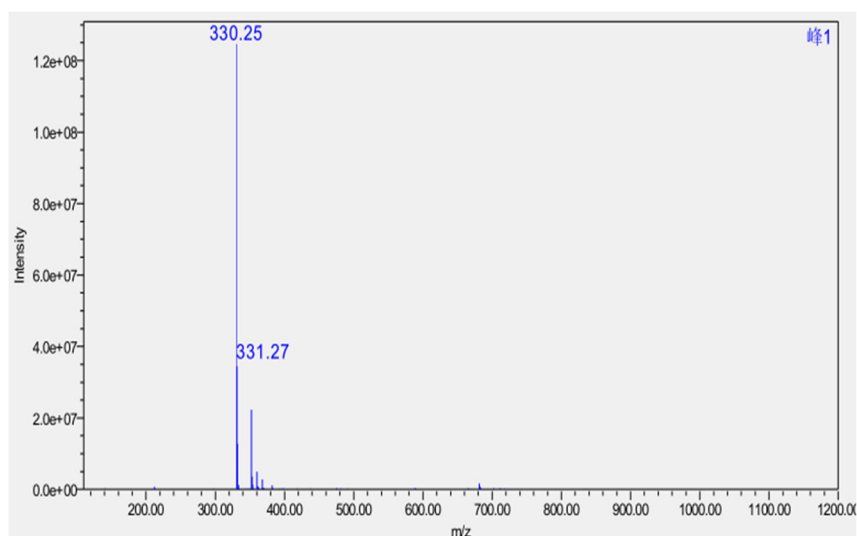

**Figure S5.** MS (ESI)  $m/z[M+H]^+$  diagram for the metabolite

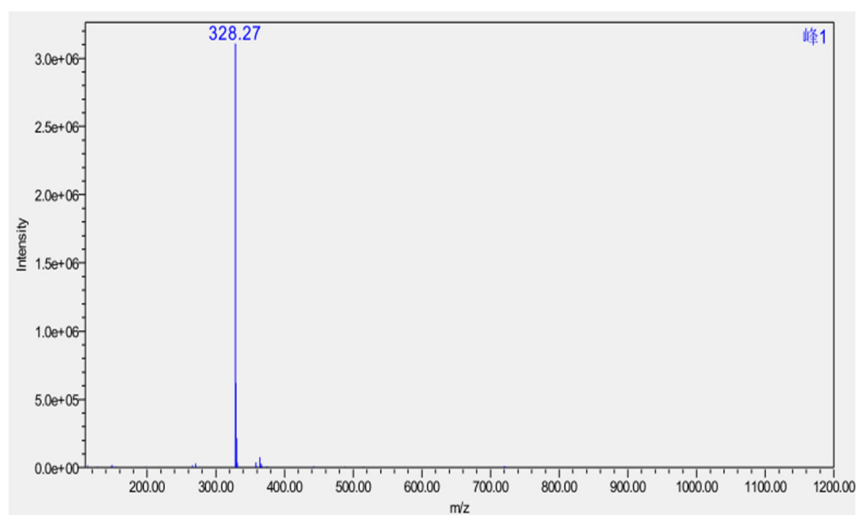

**Figure S6.** MS (ESI)  $m/z[M+H]^-$  diagram for the metabolite



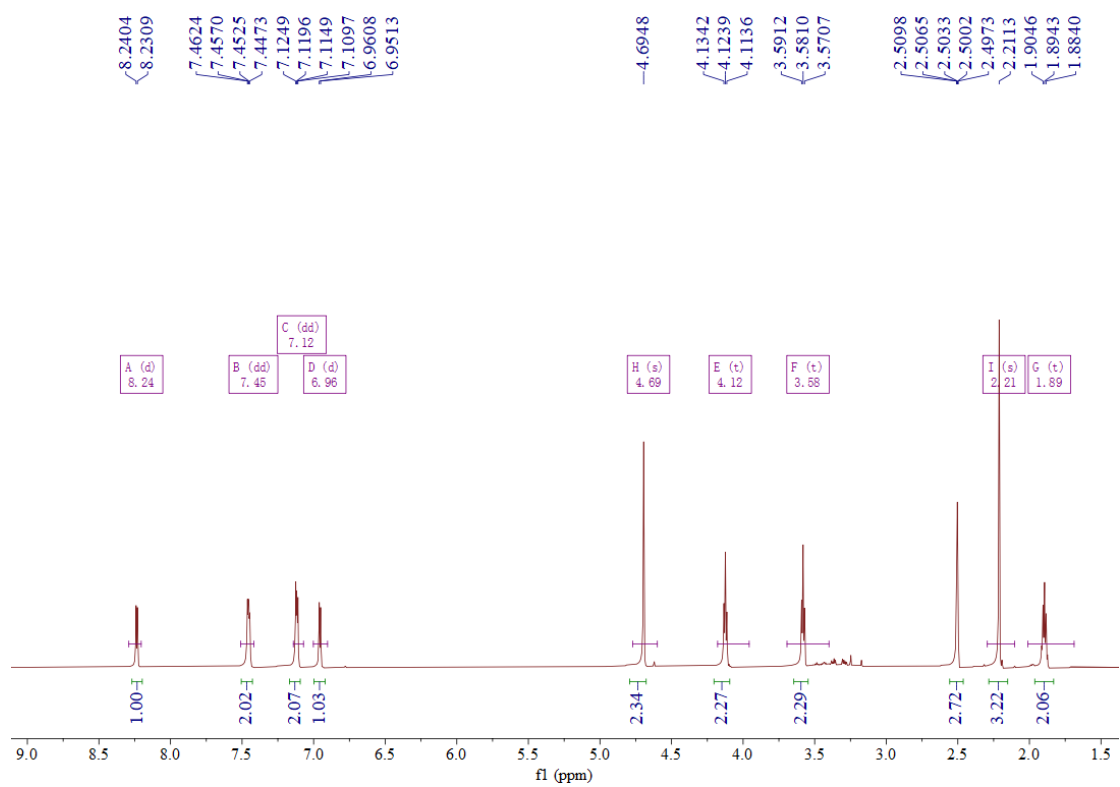

**Figure S9.** <sup>1</sup>H NOESY diagram for the *O*-demethyl rabeprazole sulfide
